# Supplementary material for: Ligand-free copper-catalyzed efficient one-pot access of benzo[b]pyrido[3,2-f][1,4]oxazepinones through O-heteroarylation-Smiles rearrangement-cyclization cascade
Source: Royal Society of Chemistry journal article supplement (doi:10.1039/c4ra11128a), 2014-01-01
Supplement: c4ra11128a1.pdf [file c4ra11128a1.pdf]

## Supporting Information

### **Ligand-free copper-catalyzed efficient one-pot access of benzo[*b*]pyrido[3,2-*f*][1,4]oxazepinones through *O*-heteroarylation-Smiles rearrangement-cyclization cascade**

Nemai C. Ganguly,<sup>†\*</sup> Pallab Mondal,<sup>‡</sup> Sushmita Roy,<sup>‡</sup> Partha Mitra<sup>†</sup>

<sup>‡</sup>Department of Chemistry, University of Kalyani, Kalyani 741235, India

<sup>†</sup>Department of Inorganic Chemistry, Indian Association for the Cultivation of Science, Jadavpur, Kolkata 700032, India

E-mail: nemai\_g@yahoo.co.in, fax: +91-33-25828282

|                                                                                                                                           |                 |
|-------------------------------------------------------------------------------------------------------------------------------------------|-----------------|
| <b>1. Table of Contents.....</b>                                                                                                          | <b>(S1)</b>     |
| <b>2. General information.....</b>                                                                                                        | <b>(S2)</b>     |
| <b>3. Crystallographic information Table for 3c and 3i.....</b>                                                                           | <b>(S3)</b>     |
| <b>4. ORTEP diagrams of 3c and 3i.....</b>                                                                                                | <b>(S4)</b>     |
| <b>5. General procedure for the preparation of <i>N</i>-substituted-<i>o</i>-chloronicotinamides and their characterization data.....</b> | <b>(S4-S5)</b>  |
| <b>6. Typical procedure for the preparation of 2-nitro3-hydroxy-pyridin (2k).....</b>                                                     | <b>(S5-S6)</b>  |
| <b>7. Copies of <sup>1</sup>H and <sup>13</sup>C NMR spectra.....</b>                                                                     | <b>(S7-S23)</b> |
| <b>8. References.....</b>                                                                                                                 | <b>(S24)</b>    |

**2. General information:** 2-Chloronicotinic acid,  $\text{Cs}_2\text{CO}_3$ ,  $\text{Cu}_2\text{O}$ , DMF, *o*-bromophenols/naphthols and 2-bromo-3-hydroxypyridine were procured from Sigma-Aldrich Chemie GmbH, Germany, Spectrochem and SRL, India. IR spectra were recorded on Perkin-Elmer FTIR L120-000A. NMR spectra were measured on Bruker AM-300L (300 MHz) and Bruker DPX-400 (400 MHz) instruments. Applied Biosystems MDS Sciex API 3200 and QTOF micro<sup>TM</sup> were used for recording mass spectra of the compounds. CHN elemental analyses were recorded on Perkin Elmer 2400 series II CHN analyzer. Silica gel (60-120 mesh, Spectrochem, India) was used for column chromatography. X-ray diffraction patterns were recorded on a Bruker Smart APEX II CCD detector. The structures were solved by SHELXS-97 (G. M. Sheldrick, *Acta Crystallogr. Sect. A.*, 2008, **64**, 112-122) and refined by full matrix least squares based on  $|\text{Fobs}|^2$  using SHELXL-97 programme. Chemical shifts of common trace impurities ( $\text{CDCl}_3$ , ppm) in some samples:  $\text{H}_2\text{O}$ ,  $\delta$  1.56,  $\text{CHCl}_3$ , 7.26 and that of ( $\text{DMSO-d}_6$ , ppm):  $\text{H}_2\text{O}$ ,  $\delta$  2.50; solvent residual peaks  $\sim$ 3.35.<sup>1</sup> In addition to this solvent impurities appeared at  $\delta$  1.26, 0.86 in some cases. Melting points were measured by open capillary method in metal bath, and are uncorrected. Light petrol used for chromatographic experiments refers to the fraction boiling at 60-80 °C. Crystallographic data for the structure reported here have been deposited with the Cambridge Crystallographic Data Centre.

### 3. Crystallographic information Table for 3c (CCDC 994880) and 3i (CCDC 994881):

|                                                             | 3c                                                              | 3i                                                            |
|-------------------------------------------------------------|-----------------------------------------------------------------|---------------------------------------------------------------|
| Empirical formula                                           | C <sub>19</sub> H <sub>13</sub> ClN <sub>2</sub> O <sub>2</sub> | C <sub>19</sub> H <sub>14</sub> N <sub>2</sub> O <sub>2</sub> |
| Formula weight                                              | 336.76                                                          | 302.32                                                        |
| Crystal system                                              | Monoclinic                                                      | Triclinic                                                     |
| Space group                                                 | P-21/c                                                          | P-1                                                           |
| <i>a</i> , Å                                                | 8.808 (4)                                                       | 7.983 (2)                                                     |
| <i>b</i> , Å                                                | 19.723 (8)                                                      | 8.944 (3)                                                     |
| <i>c</i> , Å                                                | 9.339 (4)                                                       | 10.904 (3)                                                    |
| <i>α</i> , deg                                              | 90.00                                                           | 101.512 (5)                                                   |
| <i>β</i> , deg                                              | 102.983 (10)                                                    | 95.264 (6)                                                    |
| <i>γ</i> , deg                                              | 90.00                                                           | 101.942 (5)                                                   |
| Volume                                                      | 1580.8 (11)                                                     | 739.1 (4)                                                     |
| <i>Z</i>                                                    | 4                                                               | 2                                                             |
| Density (calculated)                                        | 1.415 mg/m <sup>3</sup>                                         | 1.358 mg/m <sup>3</sup>                                       |
| Wavelength                                                  | 0.71073 Å                                                       | 0.71073 Å                                                     |
| Temperature                                                 | 293 (2) K                                                       | 150 (2) K                                                     |
| <i>F</i> (000)                                              | 696                                                             | 316                                                           |
| Absorption coefficient                                      | 0.255 mm <sup>-1</sup>                                          | 0.090 mm <sup>-1</sup>                                        |
| <i>θ</i> range for data collection                          | 2.37°-25.00°                                                    | 1.92°-25.00°                                                  |
| Reflections collected                                       | 2646                                                            | 2483                                                          |
| Independent reflections                                     | 1962                                                            | 2259                                                          |
| <i>R</i> ( <i>F</i> obsd data) [ <i>I</i> > 2σ( <i>I</i> )] | 0.1094                                                          | 0.0698                                                        |
| <i>wR</i> ( <i>F</i> <sup>2</sup> all data)                 | 0.2726                                                          | 0.2062                                                        |
| Goodness-of-fit on <i>F</i> <sup>2</sup>                    | 1.245                                                           | 0.924                                                         |
| Largest diff. peak and hole                                 | 0.706 e/Å <sup>3</sup> to -1.147 e/Å <sup>3</sup>               | 0.539 e/Å <sup>3</sup> to -0.445 e/Å <sup>3</sup>             |

$$wR2 = \{\sum [w(F_o^2 - F_c^2)^2] / \sum [w(F_o^2)^2]\}^{1/2}$$

$$R1 = \sum ||F_o| - |F_c|| / \sum |F_o|$$

**4. ORTEP diagrams of 3c and 3i. Ellipsoids are drawn at the 50% probability level.**

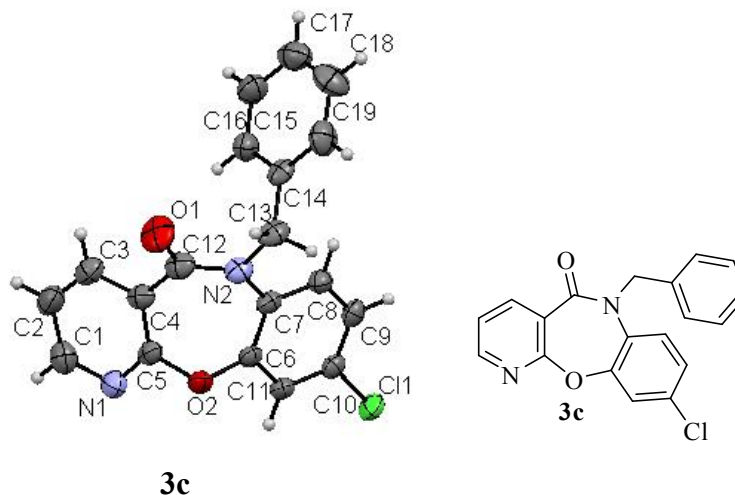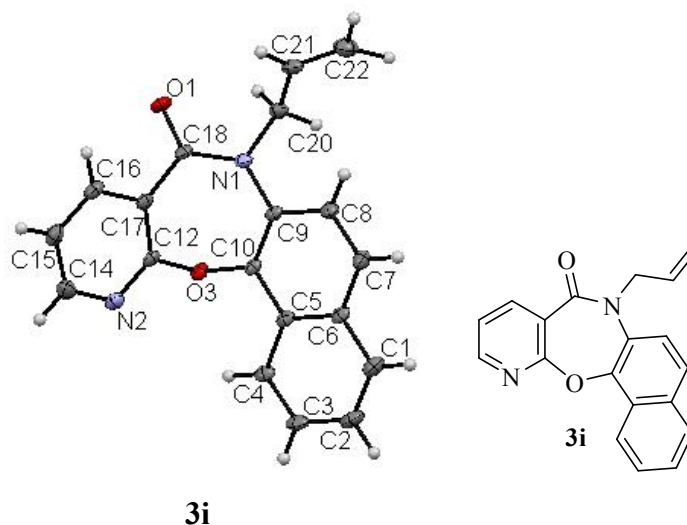

**5. General procedure for the preparation of *N*-substituted-*o*-chloronicotinamides (1a-1d):**

To a suspension of 2-chloronicotinic acid (5.00 mmol) in CH<sub>2</sub>Cl<sub>2</sub> (15 mL) was added DMF (2 drops) followed by oxalyl chloride (0.5 mL, 6 mmol). The reaction mixture was stirred at room temperature for 4 hours, and then concentrated under reduced pressure. The acid chloride thus prepared was dissolved in CH<sub>2</sub>Cl<sub>2</sub> (15 mL) at 0 °C and triethylamine (2.10 mL, 15.0 mmol) was added to it followed by benzylamine/allylamine/ethylamine/methylamine (7.50 mmol), as the case may be. The reaction mixture was allowed to warm to room temperature and stirred for further 15 hours. Water (30 mL) was added to quench the reaction and the mixture was then extracted with CH<sub>2</sub>Cl<sub>2</sub> (3x25 mL). The combined organic extracts were washed with saturated Na<sub>2</sub>CO<sub>3</sub> (2x10 mL), dried over MgSO<sub>4</sub>, and concentrated in

vacuo. The crude product was purified by flash chromatography on silica gel, eluting with EtOAc/*n*-hexane/CH<sub>2</sub>Cl<sub>2</sub>, to afford *N*-substituted-*o*-chloronicotinamides (**1a-1d**).

### **Characterization data of *N*-substituted-2-chloronicotinamides**

***N*-benzyl-2-chloronicotinamide (1a):** Off-white solid. m.p. 116-118 °C (Lit.<sup>2</sup> 120 °C); <sup>1</sup>H NMR (400 MHz, CDCl<sub>3</sub>): δ 8.46 (dd, *J* = 4.8, 2 Hz, 1H), 8.14 (dd, *J* = 7.6, 2 Hz, 1H), 7.39-7.31 (m, 6H), 6.80 (br s, 1H), 4.68 (d, *J* = 5.6 Hz, 2H). <sup>13</sup>C NMR (100 MHz, CDCl<sub>3</sub>): δ 164.7, 150.9, 147.2, 139.6, 137.3, 131.3, 128.8, 127.9, 127.8, 122.7, 44.3; IR (KBr): 3263, 3067, 3029, 2875, 1645, 1584, 1549, 1455, 1406, 1171, 1083, 1074, 971, 813 cm<sup>-1</sup>.

***N*-allyl-2-chloronicotinamide (1b):** Pink solid. m.p. 68-70 °C; <sup>1</sup>H NMR (400 MHz, CDCl<sub>3</sub>): δ 8.47 (dd, *J* = 4.8, 2 Hz, 1H), 8.13 (dd, *J* = 7.6, 1.6 Hz, 1H), 7.36 (dd, *J* = 7.6, 4.8 Hz, 1H), 6.62 (br s, 1H), 6.00-5.90 (m, 1H), 5.33 (d, *J* = 17.2 Hz, 1H), 5.23 (d, *J* = 10 Hz, 1H), 4.14-4.11 (m, 2H); <sup>13</sup>C NMR (100 MHz, CDCl<sub>3</sub>): δ 164.7, 150.7, 147.1, 139.3, 133.2, 131.4, 122.7, 117.0, 42.5; IR (KBr): 3272, 3047, 3029, 2812, 1643, 1580, 1536, 1406, 1304, 1168, 1083, 991, 939, 821, 741 cm<sup>-1</sup>.

**2-Chloro-*N*-ethylnicotinamide (1c)<sup>3</sup>:** Colourless oil; <sup>1</sup>H NMR (400 MHz, CDCl<sub>3</sub>): δ 8.72 (dd, *J* = 4.8, 2 Hz, 1H), 8.34 (dd, *J* = 7.6, 2 Hz, 1H), 7.61 (dd, *J* = 7.6, 4.8 Hz, 1H), 6.83 (br s, 1H), 3.83-3.76 (m, 2H), 1.59-1.54 (m, 3H). <sup>13</sup>C NMR (100 MHz, CDCl<sub>3</sub>): δ 164.8, 150.5, 147.1, 139.0, 131.8, 122.6, 35.1, 14.5; IR (KBr): 3272, 3077, 3029, 2979, 2937, 1646, 1583, 1556, 1400, 1313, 1175, 1077, 873, 752 cm<sup>-1</sup>.

**2-Chloro-*N*-methylnicotinamide (1d):** White solid. m.p. 94-96 °C ( Lit.<sup>4</sup> 90-92 °C); <sup>1</sup>H NMR (400 MHz, CDCl<sub>3</sub>): δ 8.58 (dd, *J* = 4.8, 2 Hz, 1H), 8.25 (dd, *J* = 7.6, 2 Hz, 1H), 7.47 (dd, *J* = 7.6, 4.8 Hz, 1H), 6.67 (br s, 1H), 3.18-3.17 (m, 3H); <sup>13</sup>C NMR (100 MHz, CDCl<sub>3</sub>): δ 165.6, 150.7, 147.1, 139.2, 131.6, 122.7, 26.9; IR (KBr): 3281, 3084, 2944, 1652, 1585, 1556, 1402, 1322, 1178, 1082, 1000, 843, 750 cm<sup>-1</sup>.

**6. Typical procedure for the preparation of 2-nitropyridin-3-ol (2k):** 3-Hydroxypyridine (960 mg, 0.01 mole) was added gradually to ice-cooled concentrated sulfuric acid (6.5 mL) with constant stirring. The addition took 20 min and the internal temperature was not allowed to exceed 30 °C. A cold mixture of nitric acid (0.5 mL) (sp gr 1.50) and concentrated sulfuric acid (0.9 mL) was poured gradually over 30 min without external cooling maintaining the temperature at 40-45 °C. The mixture was allowed to stand overnight. Then poured into a

mixture of ice and water (15 g) and neutralized using NaHSO<sub>4</sub> to obtain final pH ca. 4. The mixture was extracted with CH<sub>2</sub>Cl<sub>2</sub> (5x20 mL), dried over Na<sub>2</sub>SO<sub>4</sub>, and the solvent was removed at reduced pressure leaving a yellow crystalline product (1.05 g, 75% yield) mp: 64-66 °C (lit.<sup>5</sup> 67-69 °C).

IR (KBr): 3083, 2919, 2738, 1615, 1568, 1535, 1464, 1361, 1328, 1254, 1200, 1140, 1106, 1056, 875, 818 cm<sup>-1</sup>.

## 7. Copies of $^1\text{H}$ and $^{13}\text{C}$ NMR spectra:

### $^1\text{H}$ -NMR of **1a**

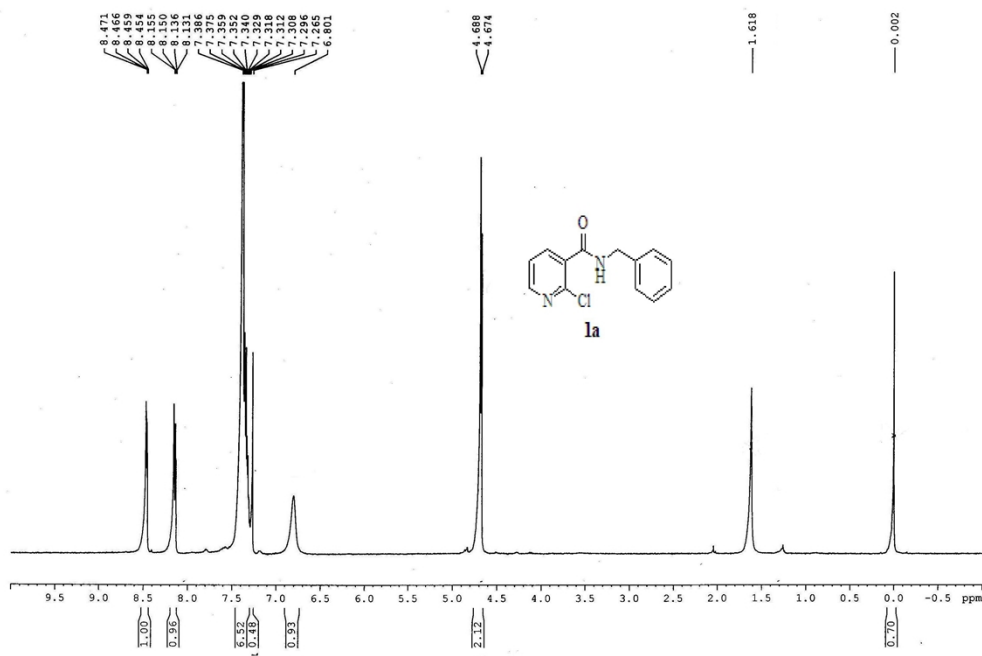

### $^{13}\text{C}$ -NMR of **1a**

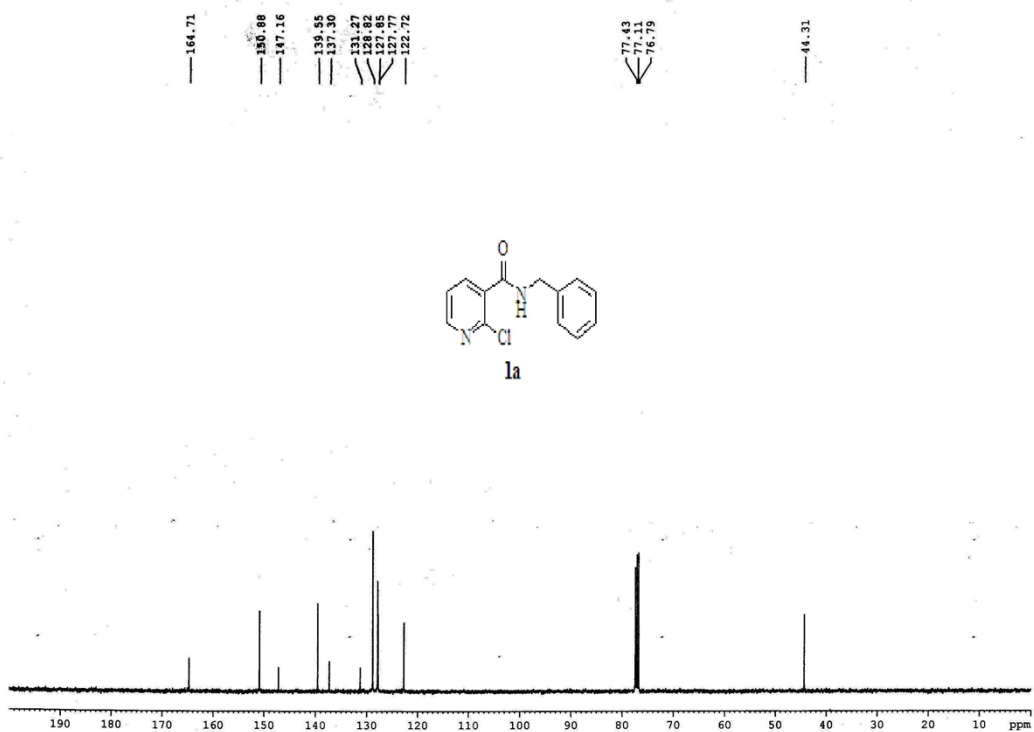

# <sup>1</sup>H-NMR of 1b

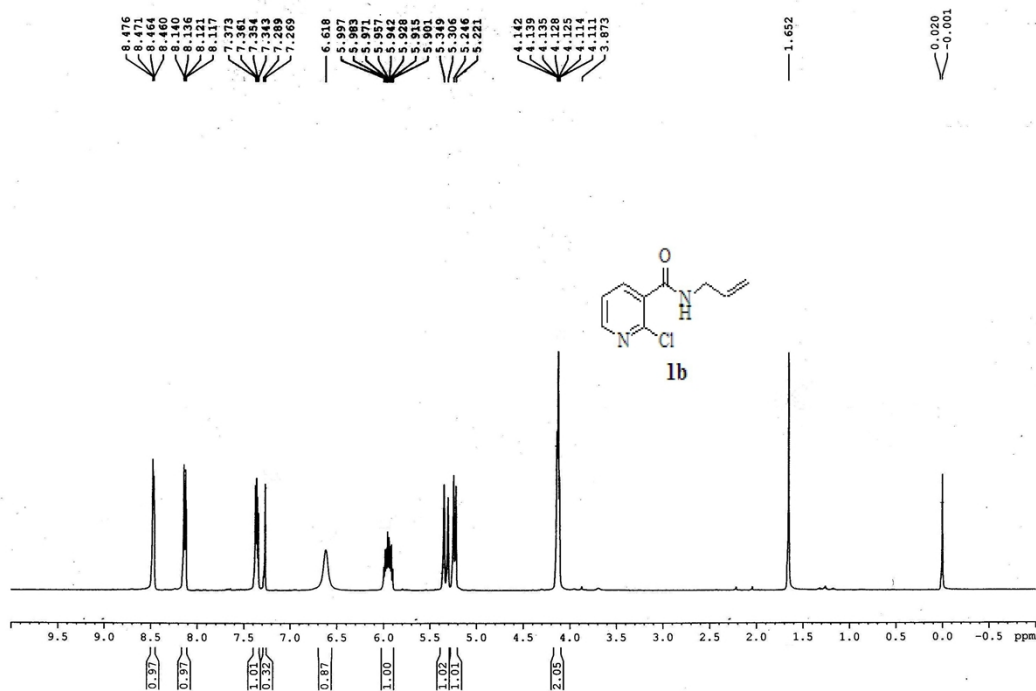

# <sup>13</sup>C-NMR of 1b

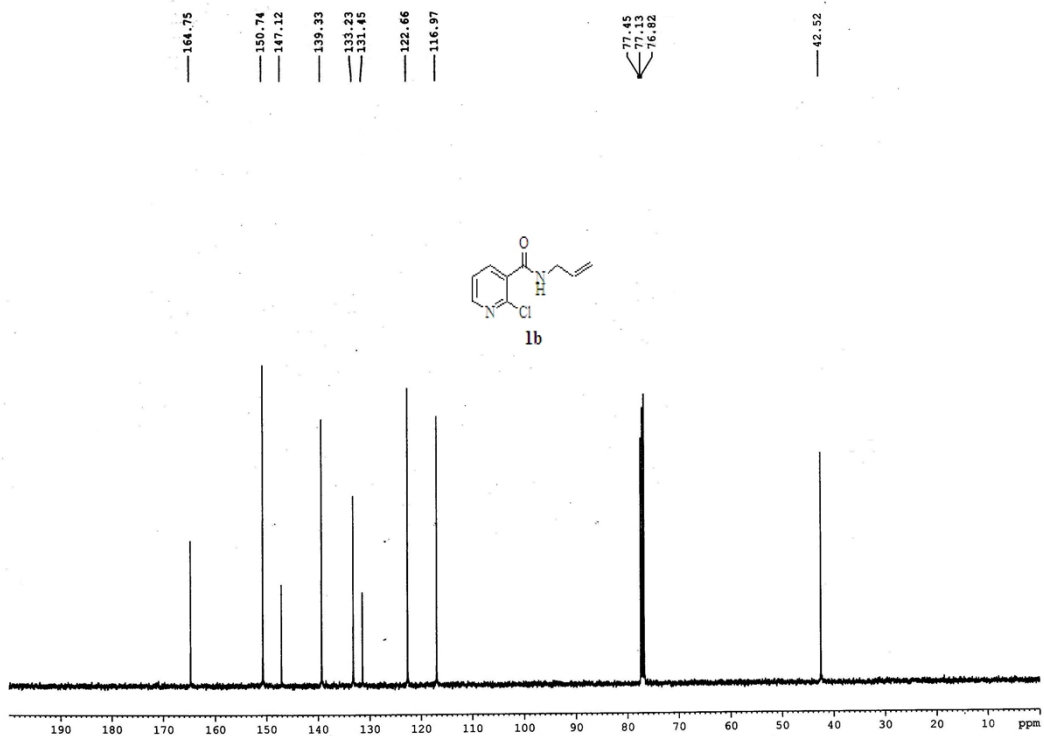



### <sup>1</sup>H-NMR of 1c

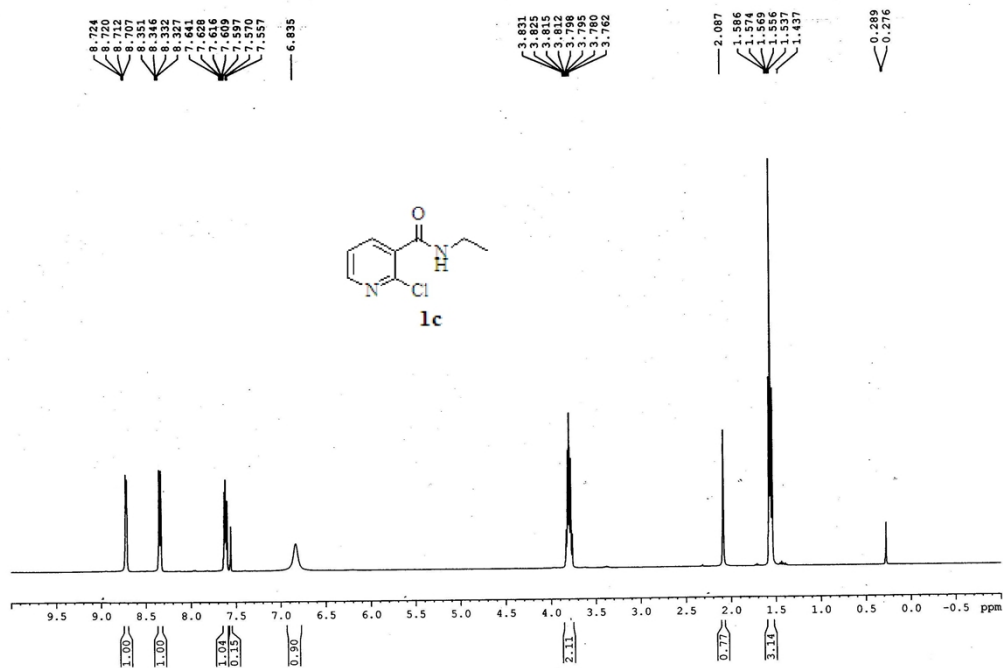

### <sup>13</sup>C-NMR of 1c

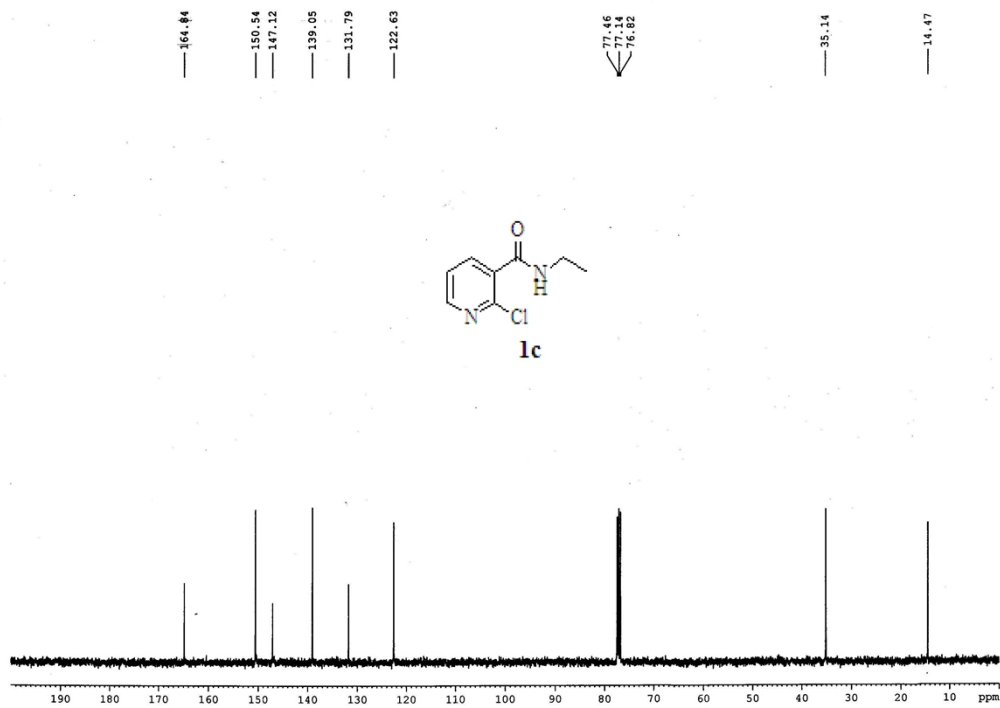

# <sup>1</sup>H-NMR of 1d

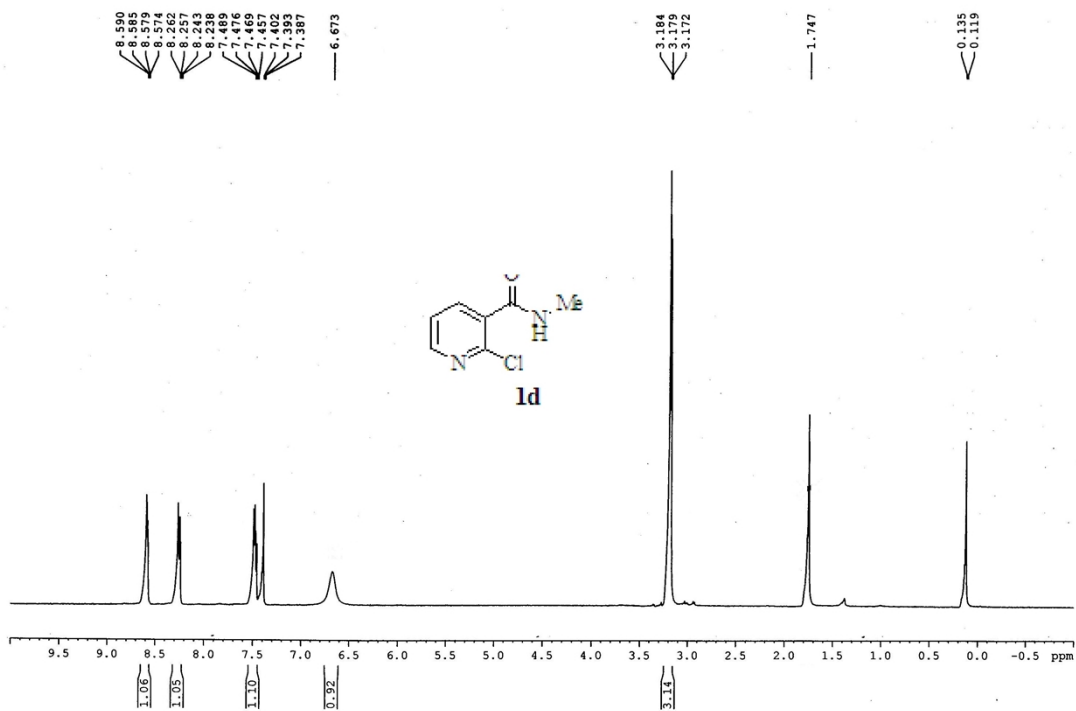

# <sup>13</sup>C-NMR of 1d

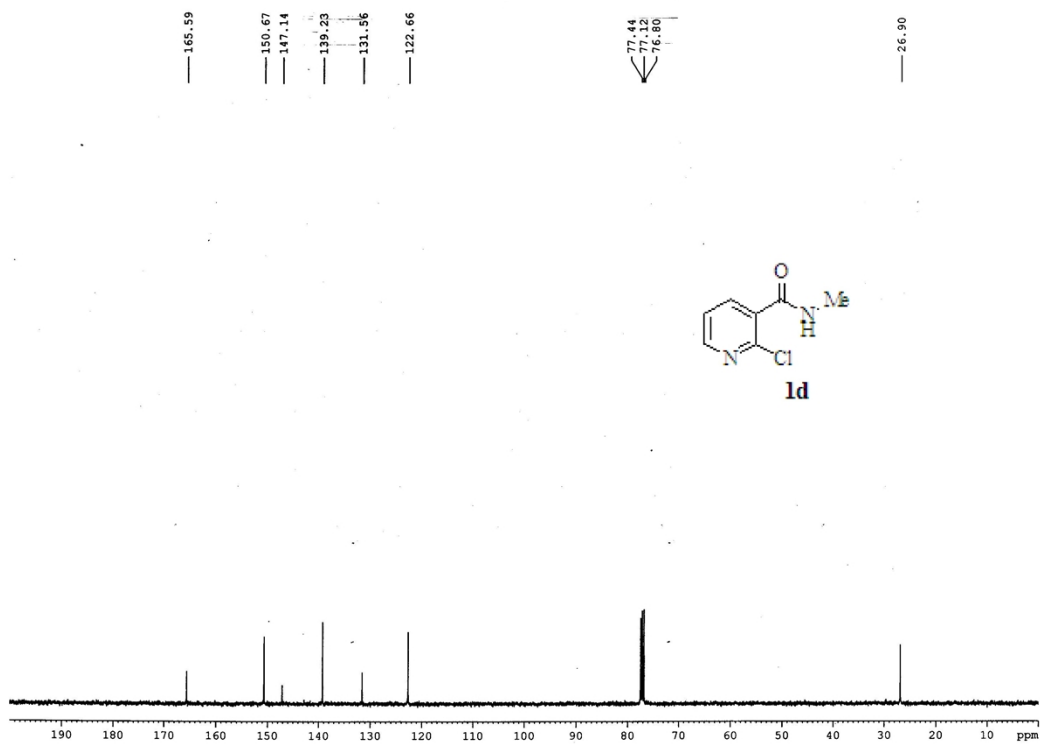

### <sup>1</sup>H-NMR of 3a

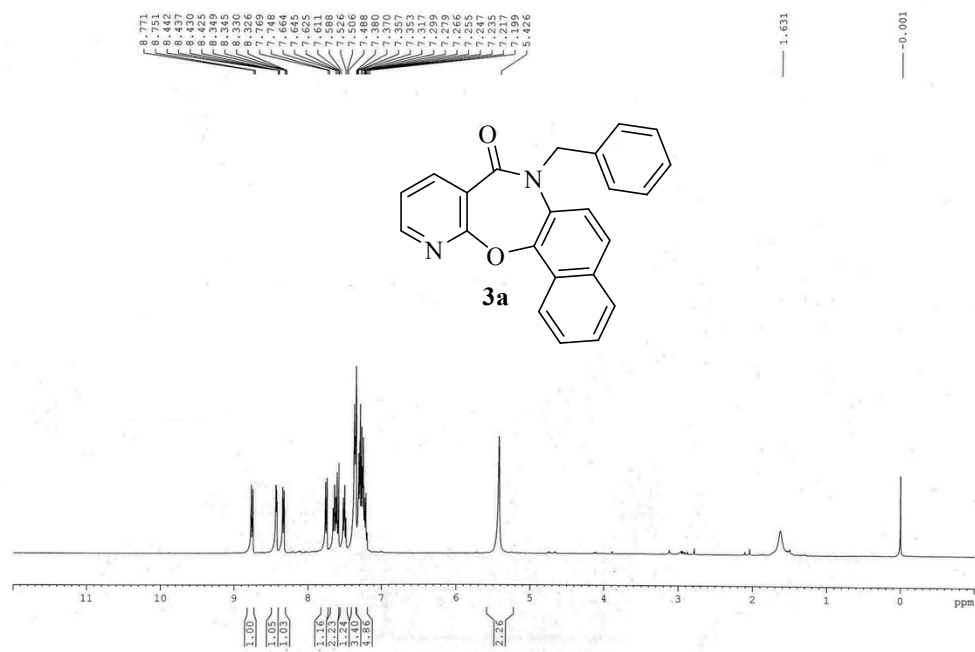

### <sup>13</sup>C-NMR of 3a

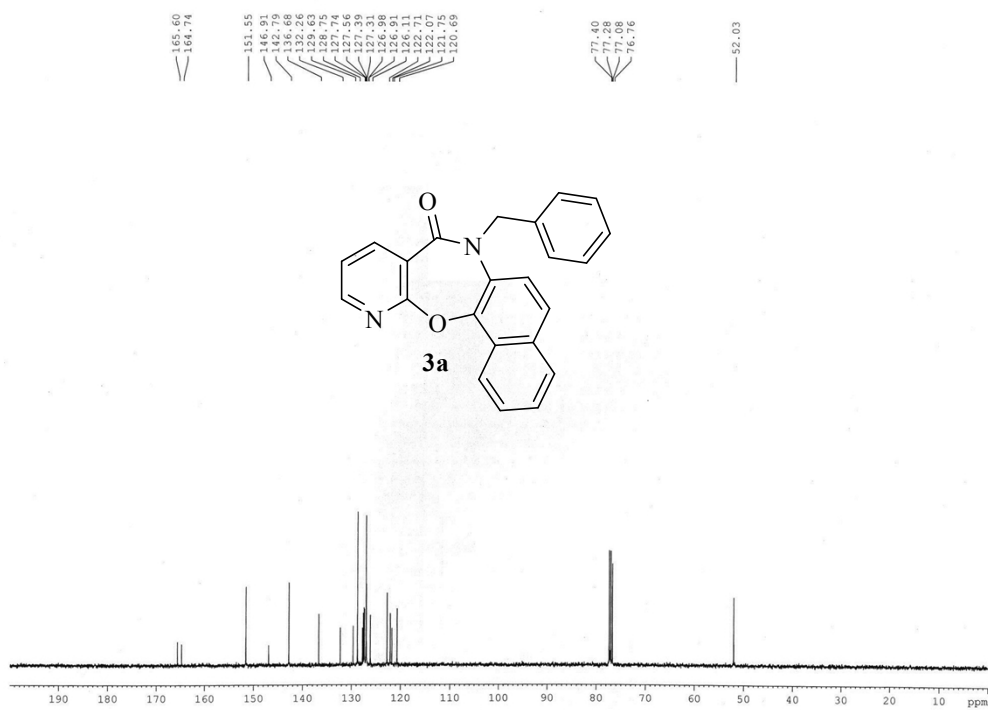

### <sup>1</sup>H-NMR of 3b

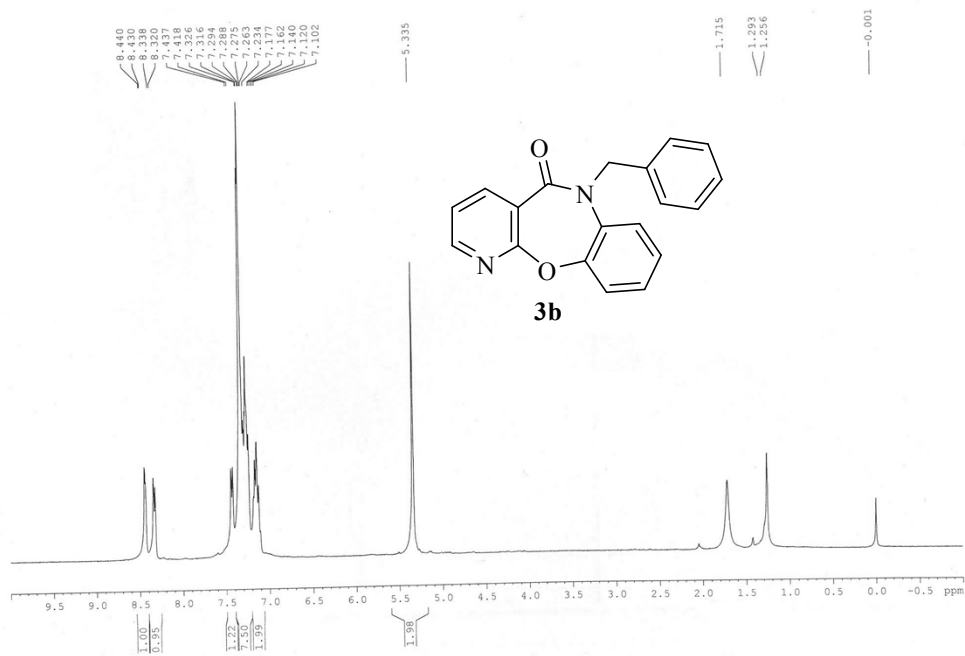

### <sup>13</sup>C-NMR of 3b

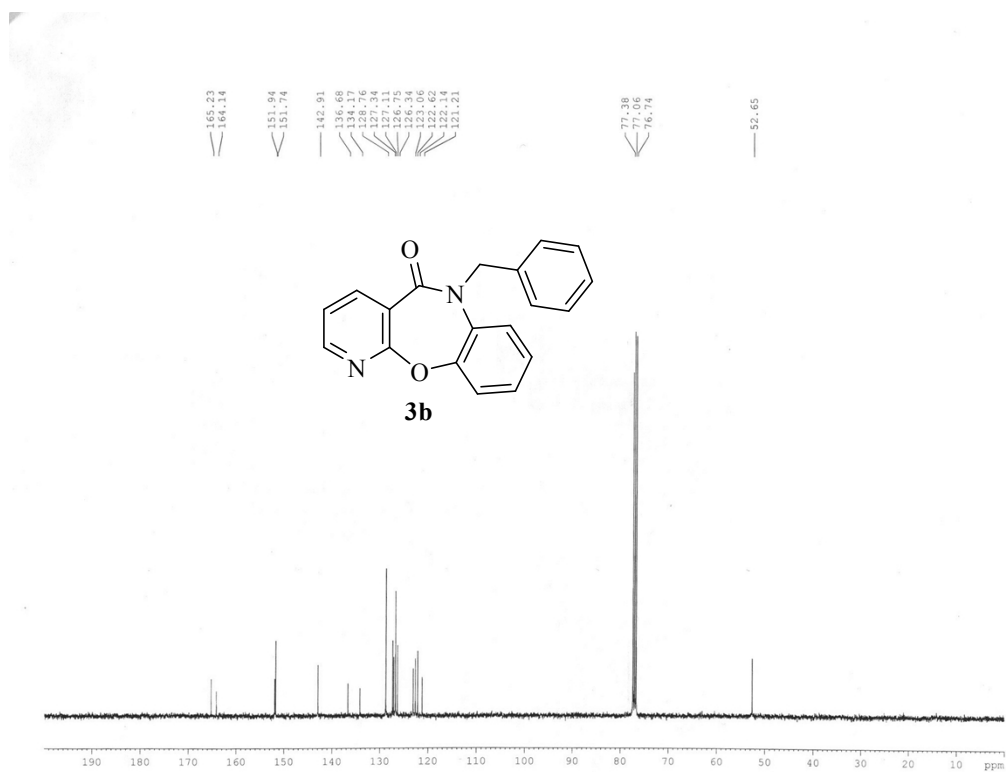

### <sup>1</sup>H-NMR of 3c

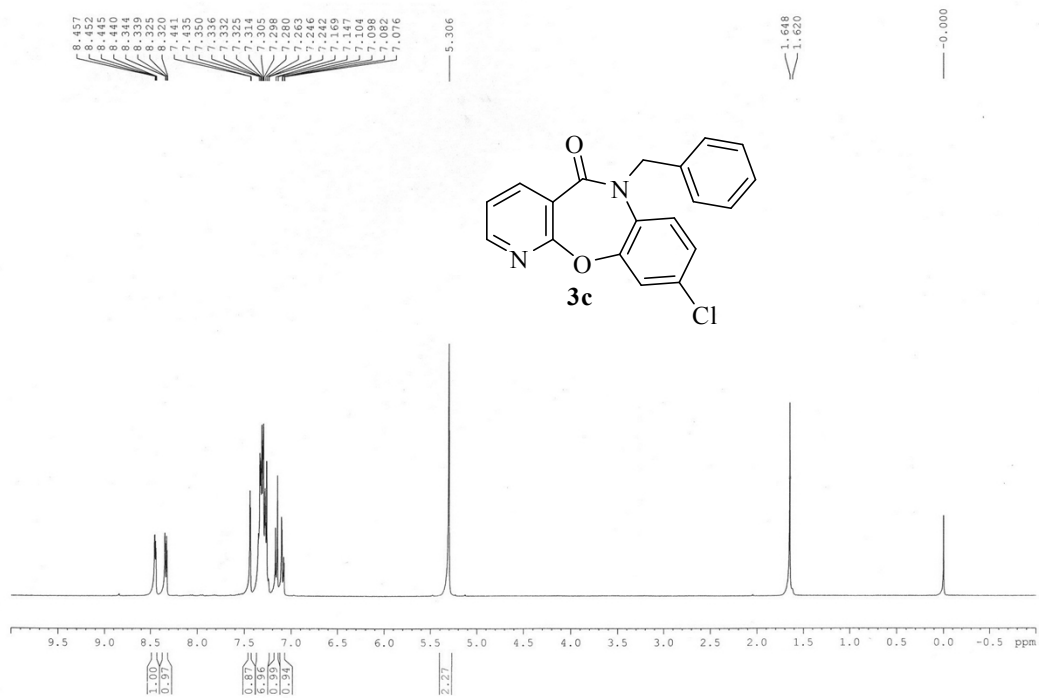

### <sup>13</sup>C-NMR of 3c

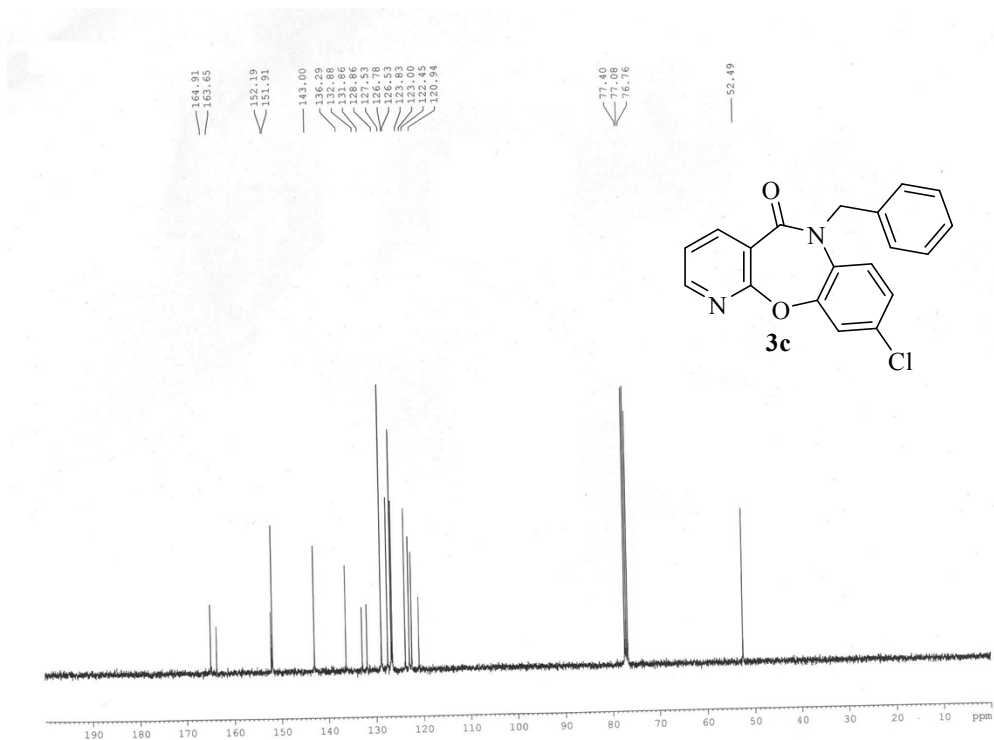

### <sup>1</sup>H-NMR of 3d

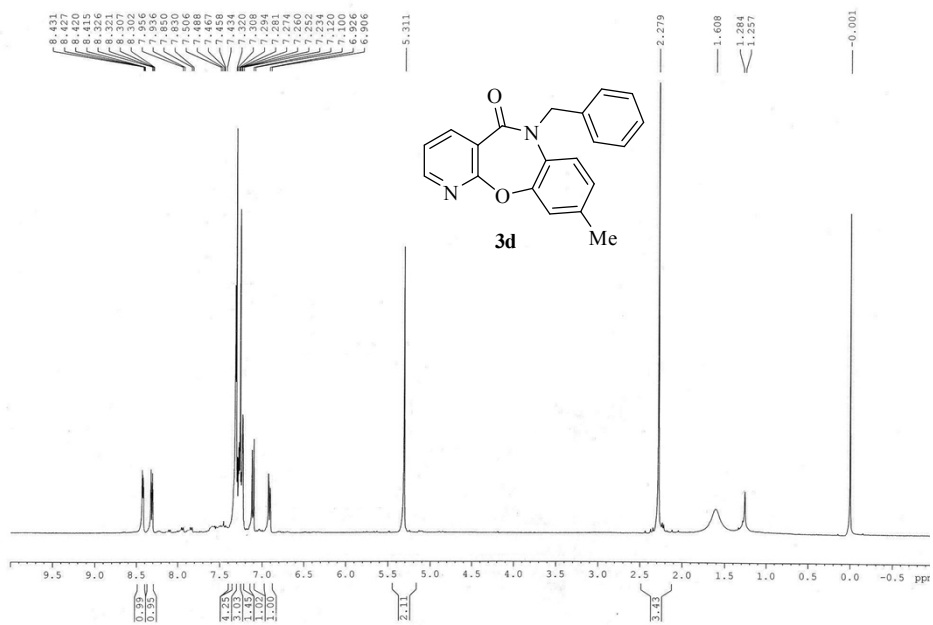

### <sup>13</sup>C-NMR of 3d

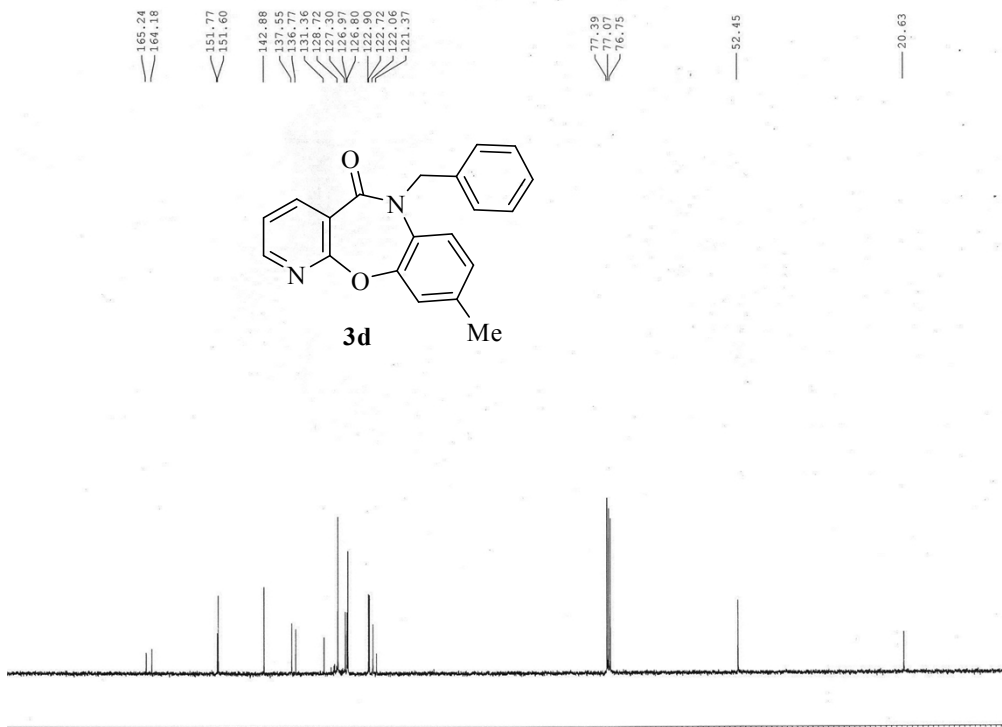

### <sup>1</sup>H-NMR of 3e

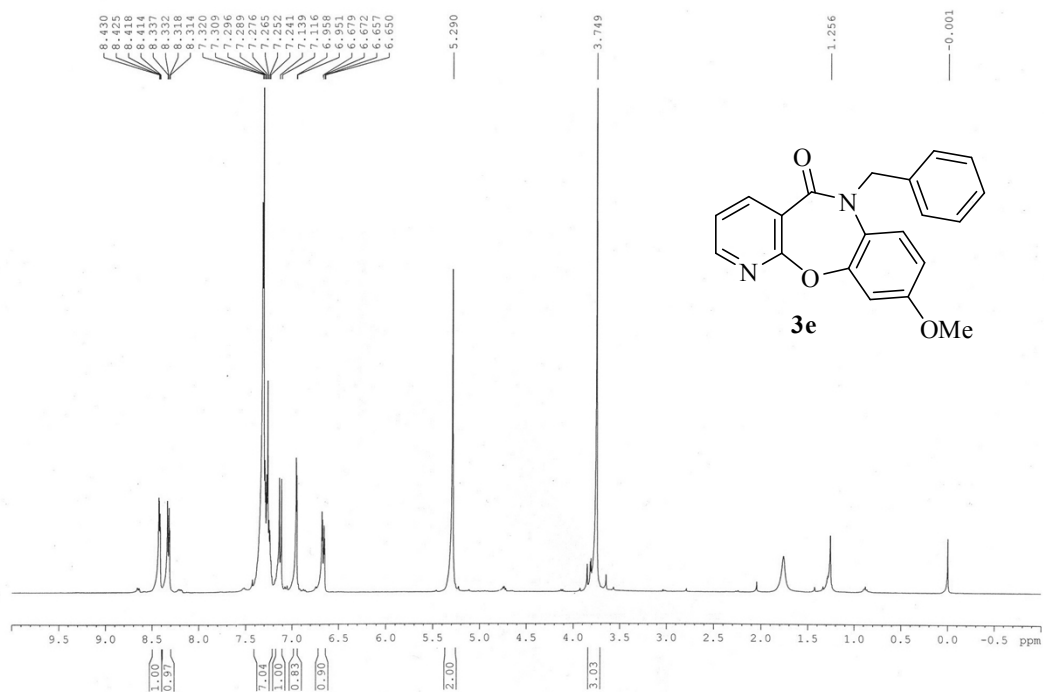

### <sup>13</sup>C-NMR of 3e

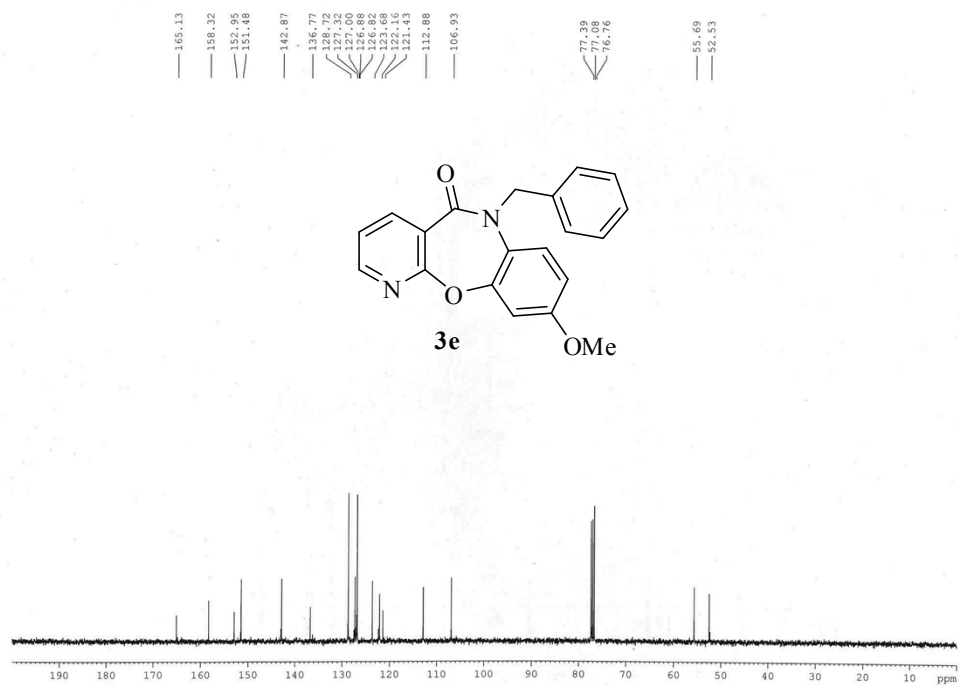

### <sup>1</sup>H-NMR of 3f

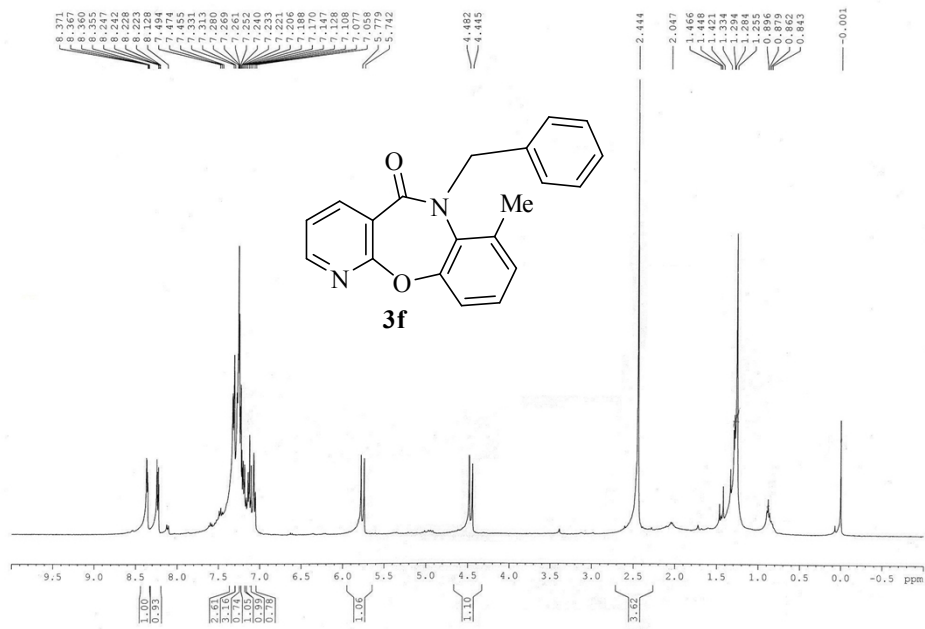

### <sup>13</sup>C-NMR of 3f

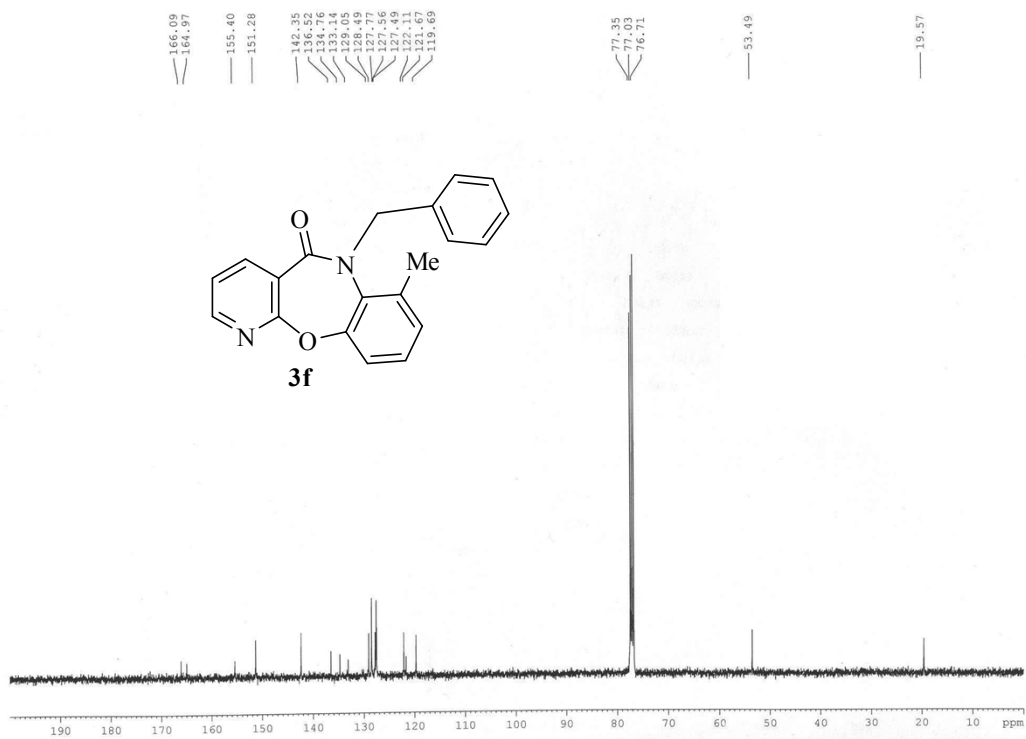



### <sup>1</sup>H-NMR of 3g

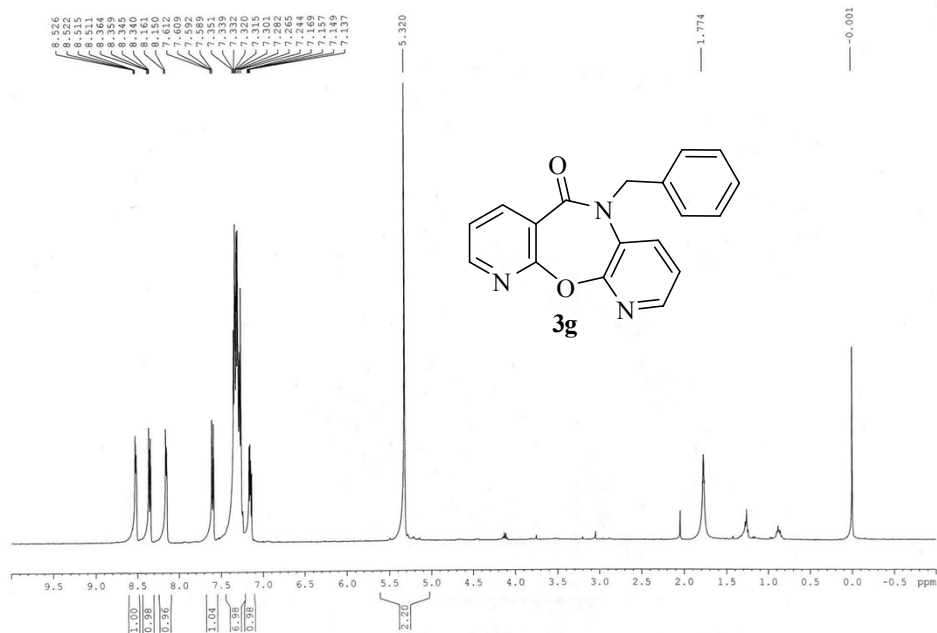

### <sup>13</sup>C-NMR of 3g

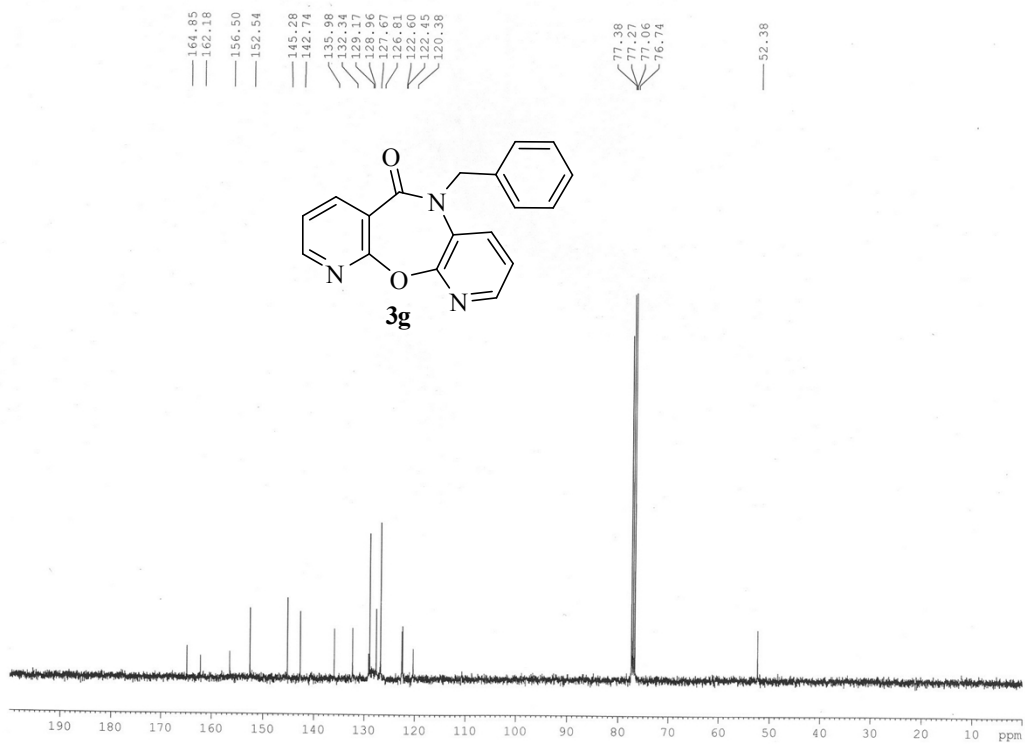

# <sup>1</sup>H-NMR of 3h

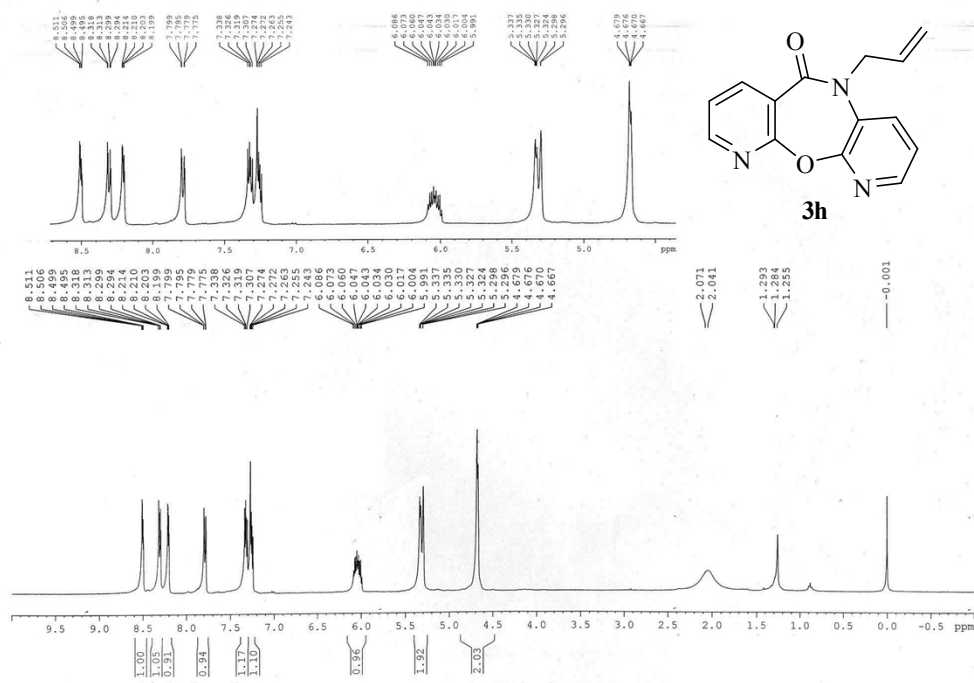

# <sup>13</sup>C-NMR of 3h

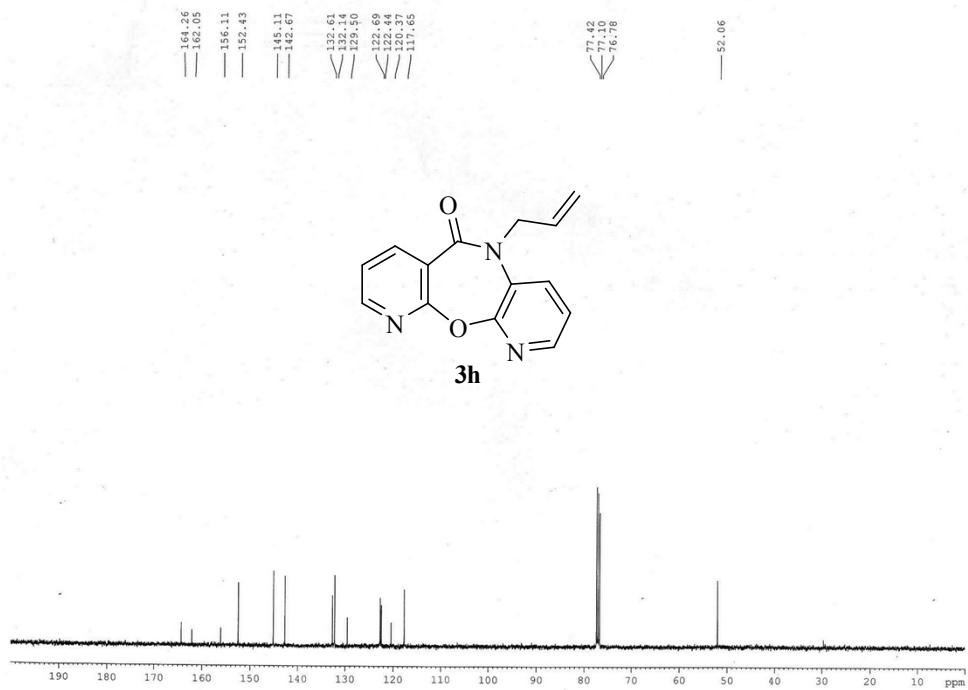

### <sup>1</sup>H-NMR of 3i

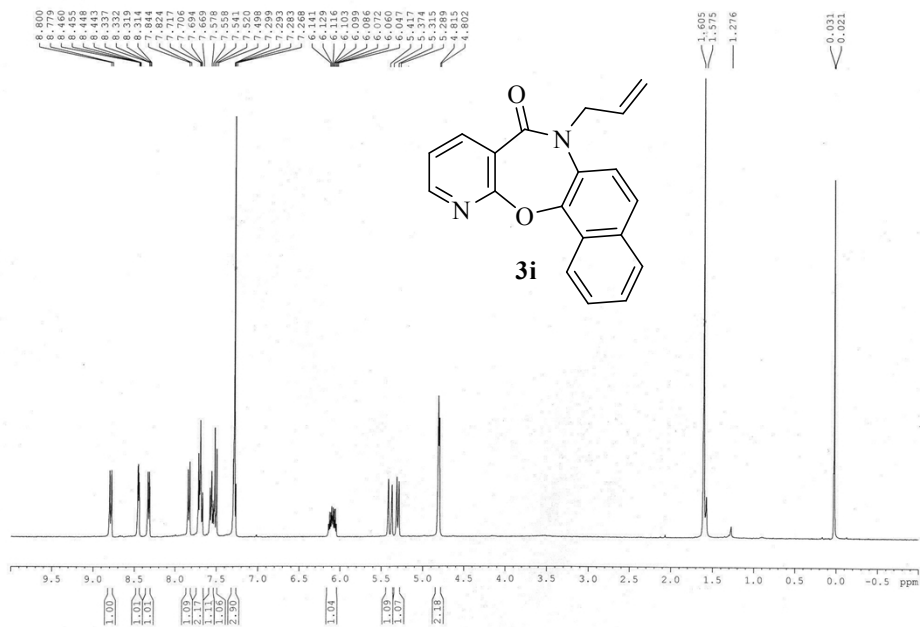

### <sup>13</sup>C-NMR of 3i

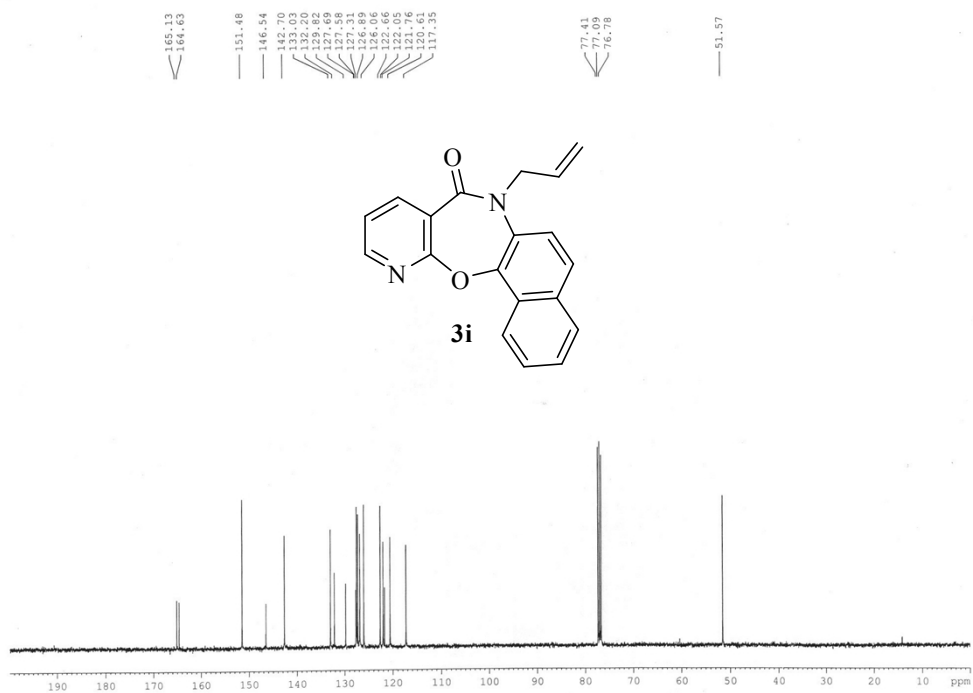

# <sup>1</sup>H-NMR of 3j

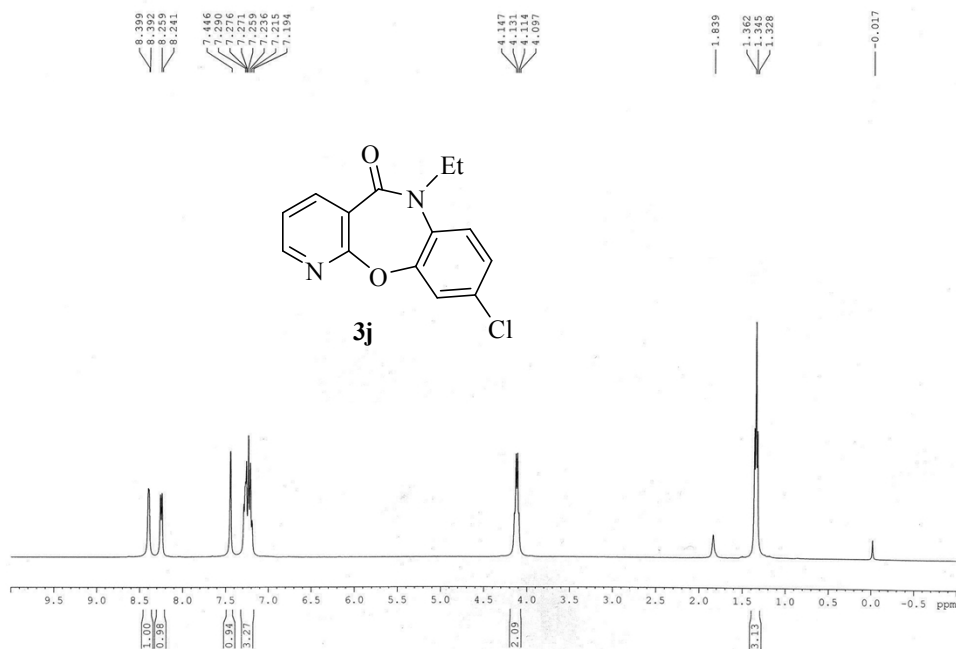

# <sup>13</sup>C-NMR of 3j

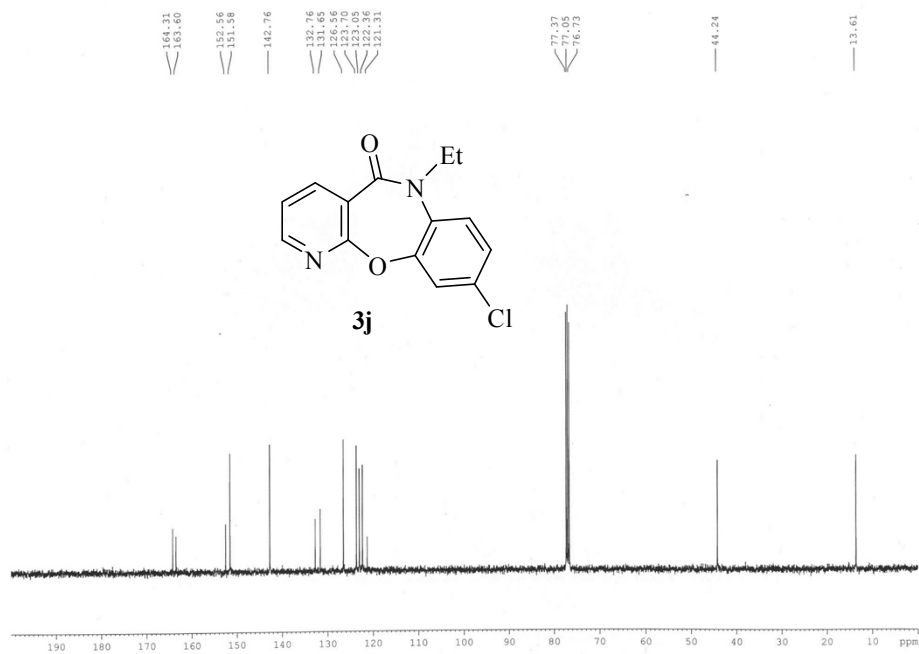

### <sup>1</sup>H-NMR of 3k

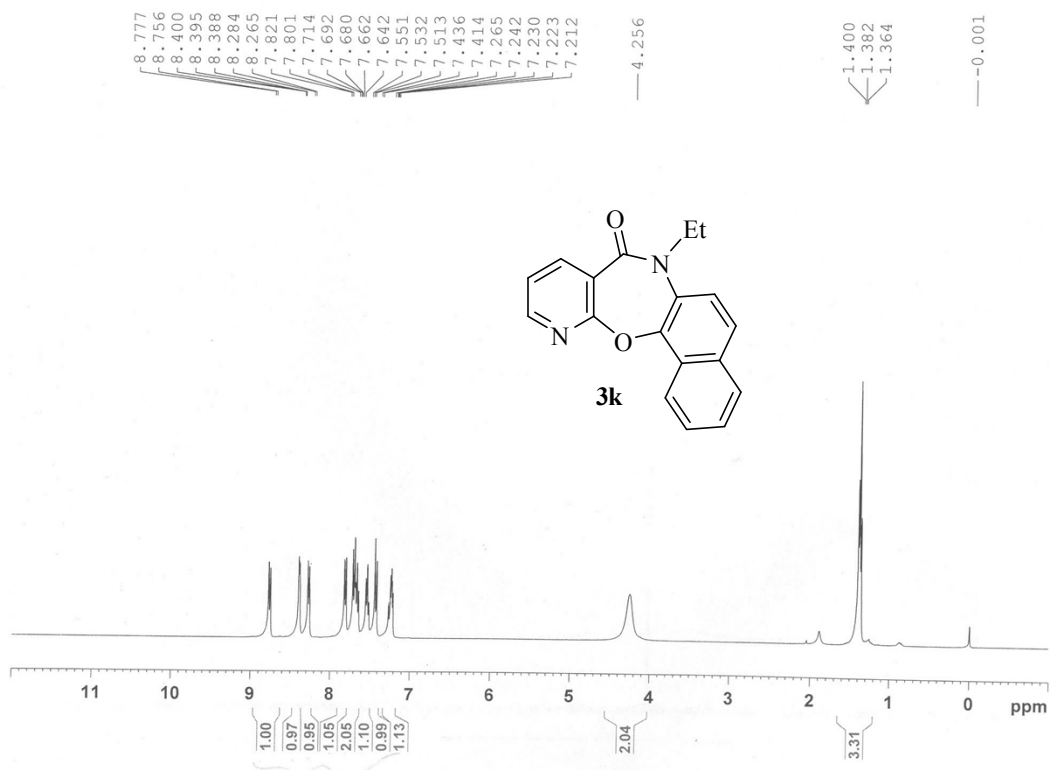

### <sup>13</sup>C-NMR of 3k

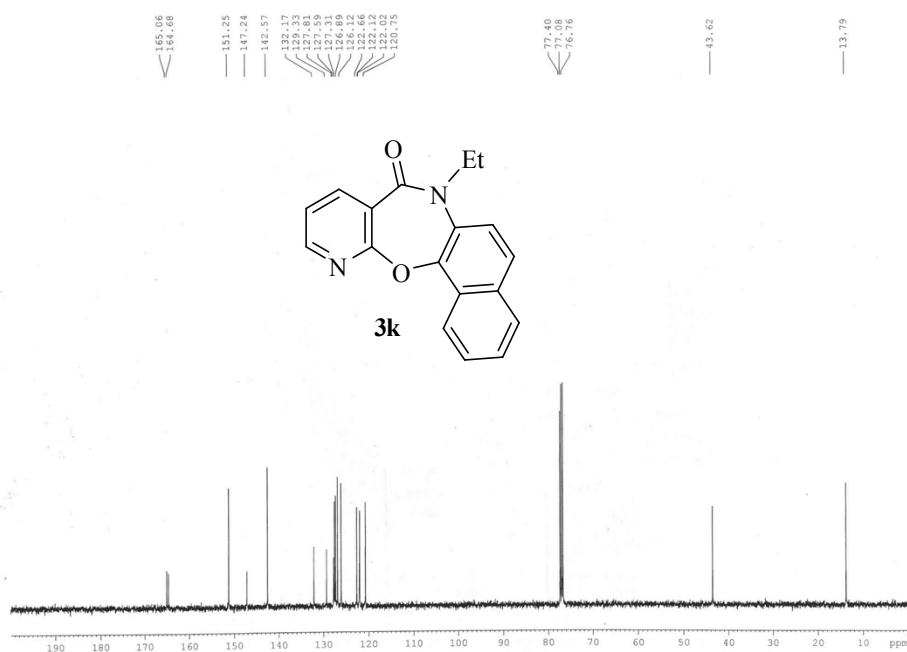

### <sup>1</sup>H-NMR of 3I

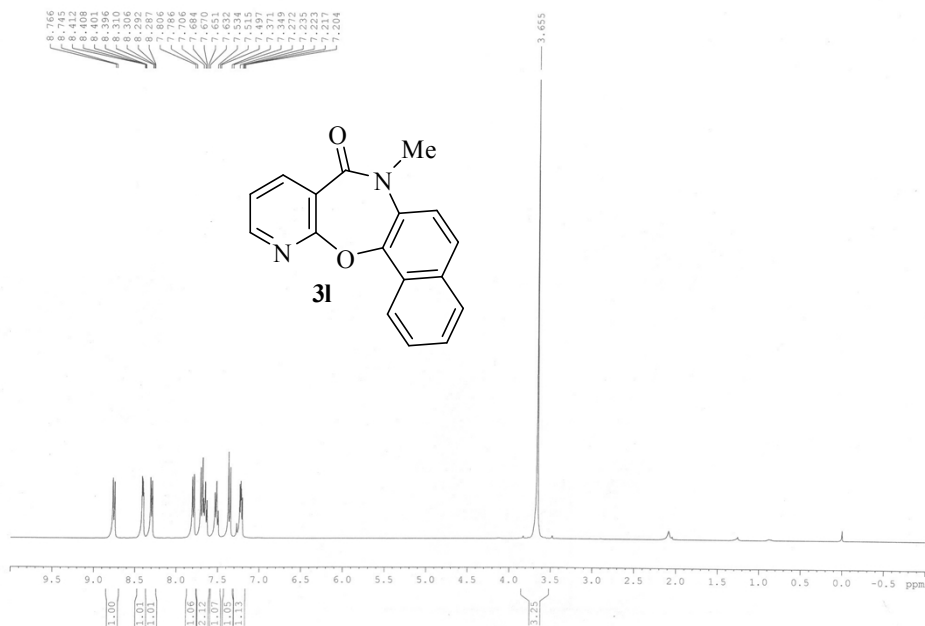

### <sup>13</sup>C-NMR of 3I

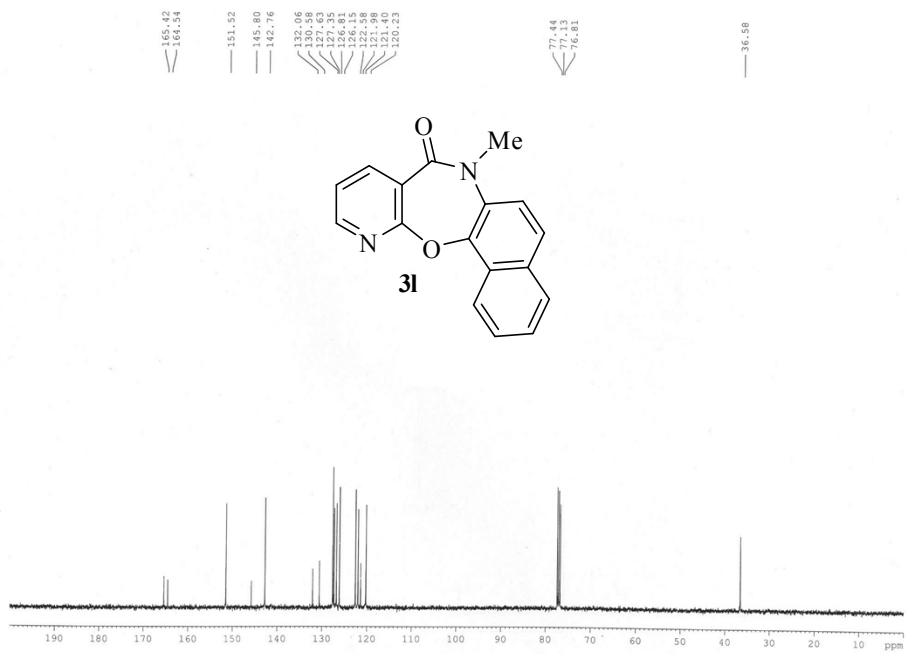

# <sup>1</sup>H-NMR of 4a

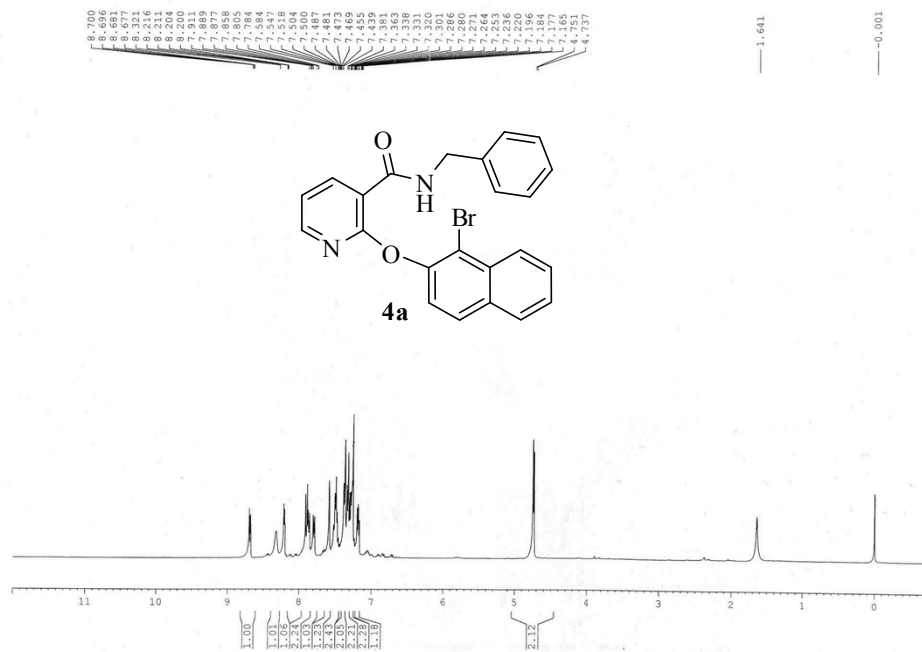

# <sup>13</sup>C-NMR of 4a

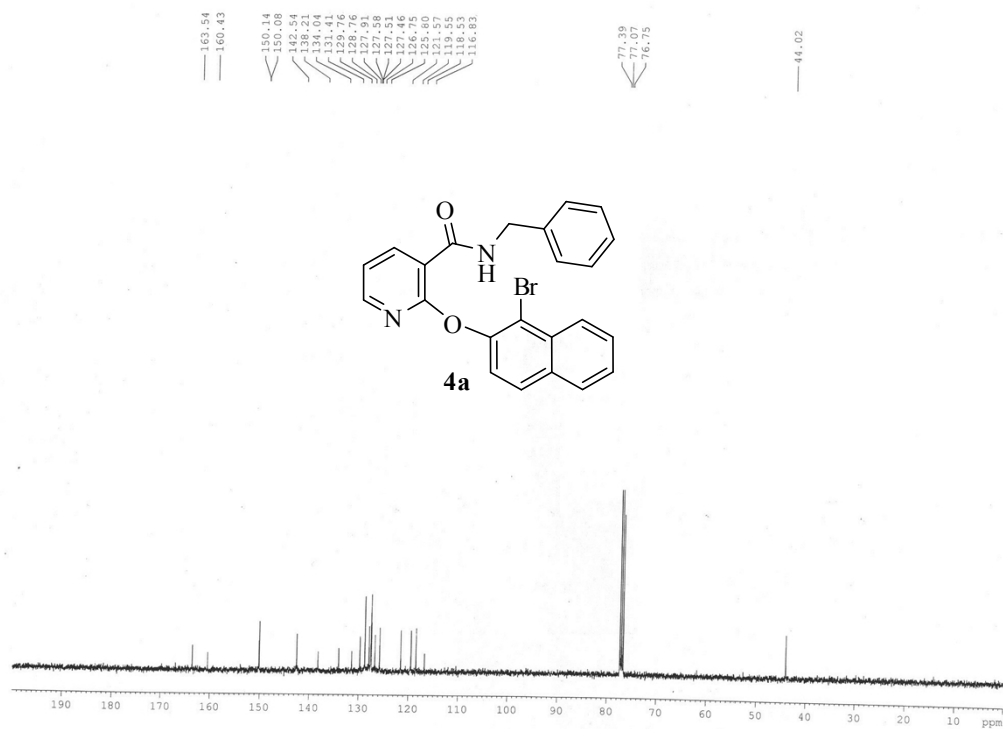

## 8. Notes and references:

- 1 H. E. Gottlieb, V. Kotlyar and A. Nudelman, *J. Org. Chem.*, 1997, **62**, 7512-7515.
- 2 F. J. Vinick, N. A. Saccomano, B. K. Koe, J. A. Nielsen, I. H. Williams, P. F. Thadeio, S. Jung, M. Meltz, J. Johnson, Jr., L. A. Lebel, L. L. Russo and D. Helweg, *J. Med. Chem.*, 1991, **34**, 86-89.
- 3 K. Kobayashi, T. Komatsu, D. Nakamura and H. Konishi, *Heterocycles*, 2009, **78**, 1041-1046.
- 4 L. Thunus, C. L. Lapiere, *Eur. J. Med. Chem. Chim. Ther.*, 1974, **9**, 55-58.
- 5 R. C. De Selms, *J. Org. Chem.*, **1968**, **33**, 478.
